# Supplementary material for: Quantitative Proteome Analysis Reveals Melissa officinalis Extract Targets Mitochondrial Respiration in Colon Cancer Cells
Source: MDPI journal article supplement (doi:10.3390/molecules27144533), 2022-07-15
Supplement: s1 [file s1]

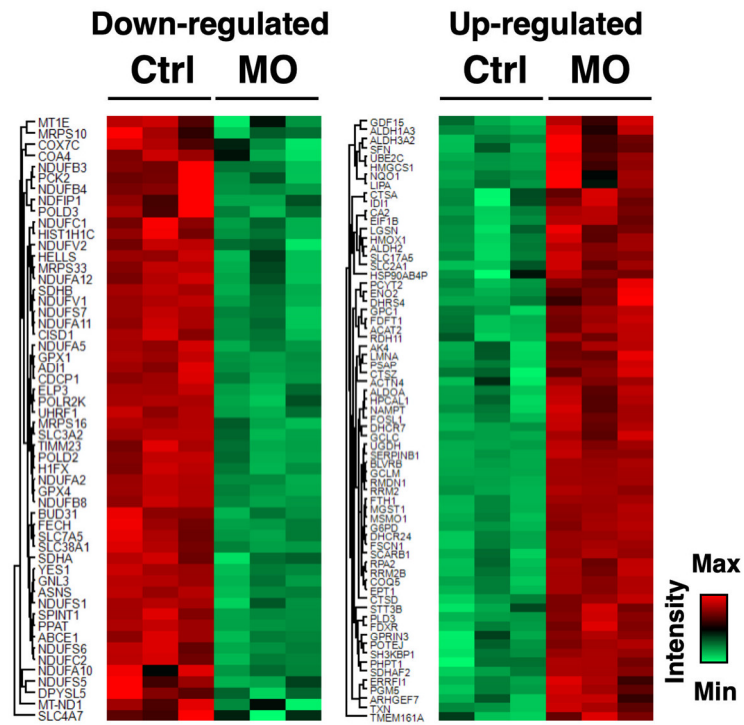

**Figure S1.** Statistical analysis of the MO proteomics results. Heatmap of up-regulated and down-regulated proteins in MO treatment relative to Ctrl treatment. One column represents one biological replicate under each condition.



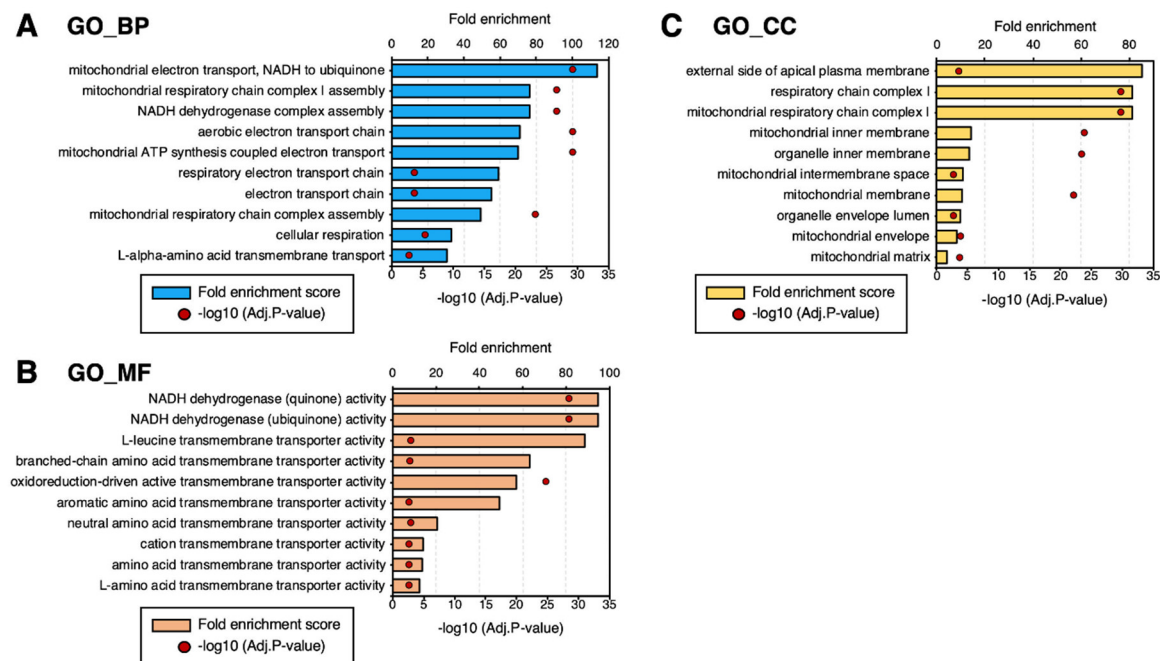

**Figure S2.** Gene ontology (GO) enrichment analysis of down-regulated proteins in MO treatment. (A,B,C) Top ten of (GO) enrichment analysis of down-regulated proteins in MO-treated HCT116 cells. Categories of GO enrichment analysis included (A) GO\_BP: GO Biological Processes (B) GO\_MF: GO Molecular Function (C) GO\_CC: GO Cellular Component. Fold enrichment were calculated as (number of down-regulated genes in that GO-term/number of down-regulated genes)/(number of total genes in that GO-term/database total genes).



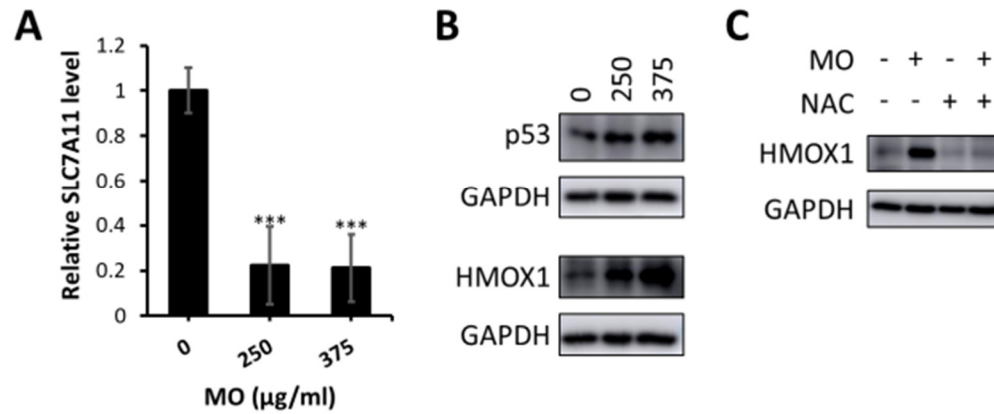

**Figure S3.** MO induced ferroptosis-associated molecular regulation. (A) The relative mRNA level of SLC7A11. Data were normalized by the expression level of GAPDH. (B) Protein expression of p53 and HMOX1 in CRC cells treated with MO at 0, 250 or 375 μ g/ml. GAPDH was applied as the loading control. (C) Protein expression of HMOX1 in the presence or absence of 375 μ g/ml MO or 5 mM NAC.



**Table S1. 54 down-regulated proteins in MO treatment by two sample t-test.**

| Gene names | Protein IDs | Protein names                                                                                                                         | Fold change | q-value |
|------------|-------------|---------------------------------------------------------------------------------------------------------------------------------------|-------------|---------|
| GPX4       | P36969      | Phospholipid hydroperoxide glutathione peroxidase, mitochondrial                                                                      | 0.403       | 0.00    |
| SLC4A7     | Q9Y6M7      | Sodium bicarbonate cotransporter 3;Electroneutral sodium bicarbonate exchanger 1                                                      | 0.515       | 0.05    |
| NDUFS6     | O75380      | NADH dehydrogenase [ubiquinone] iron-sulfur protein 6, mitochondrial                                                                  | 0.567       | 0.01    |
| MT-ND1     | P03886      | NADH-ubiquinone oxidoreductase chain 1                                                                                                | 0.593       | 0.02    |
| PPAT       | Q06203      | Amidophosphoribosyltransferase                                                                                                        | 0.596       | 0.00    |
| NDUFS7     | O75251      | NADH dehydrogenase [ubiquinone] iron-sulfur protein 7, mitochondrial                                                                  | 0.618       | 0.01    |
| SDHB       | P21912      | Succinate dehydrogenase [ubiquinone] iron-sulfur subunit, mitochondrial                                                               | 0.625       | 0.02    |
| NDUFA10    | O95299      | NADH dehydrogenase [ubiquinone] 1 alpha subcomplex subunit 10, mitochondrial                                                          | 0.644       | 0.03    |
| NDUFB3     | O43676      | NADH dehydrogenase [ubiquinone] 1 beta subcomplex subunit 3                                                                           | 0.644       | 0.01    |
| NDUFA11    | Q86Y39      | NADH dehydrogenase [ubiquinone] 1 alpha subcomplex subunit 11                                                                         | 0.666       | 0.01    |
| NDUFB4     | O95168      | NADH dehydrogenase [ubiquinone] 1 beta subcomplex subunit 4                                                                           | 0.673       | 0.01    |
| NDUFB8     | O95169      | NADH dehydrogenase [ubiquinone] 1 beta subcomplex subunit 8, mitochondrial                                                            | 0.686       | 0.01    |
| POLD3      | Q15054      | DNA polymerase delta subunit 3                                                                                                        | 0.693       | 0.02    |
| NDUFA2     | O43678      | NADH dehydrogenase [ubiquinone] 1 alpha subcomplex subunit 2                                                                          | 0.703       | 0.01    |
| GPX1       | P07203      | Glutathione peroxidase 1                                                                                                              | 0.709       | 0.02    |
| HIST1H1C   | P16403      | Histone H1.2                                                                                                                          | 0.710       | 0.02    |
| NDUFV1     | P49821      | NADH dehydrogenase [ubiquinone] flavoprotein 1, mitochondrial                                                                         | 0.713       | 0.01    |
| TIMM23     | O14925      | Mitochondrial import inner membrane translocase subunit Tim23;Putative mitochondrial import inner membrane translocase subunit Tim23B | 0.714       | 0.01    |
| NDUFS5     | O43920      | NADH dehydrogenase [ubiquinone] iron-sulfur protein 5                                                                                 | 0.714       | 0.03    |
| NDUFC1     | O43677      | NADH dehydrogenase [ubiquinone] 1 subunit C1, mitochondrial                                                                           | 0.727       | 0.02    |
| ABCE1      | P61221      | ATP-binding cassette sub-family E member 1                                                                                            | 0.731       | 0.01    |
| FECH       | P22830      | Ferrochelatase, mitochondrial                                                                                                         | 0.734       | 0.02    |
| PCK2       | Q16822      | Phosphoenolpyruvate carboxykinase [GTP], mitochondrial                                                                                | 0.738       | 0.02    |



|         |        |                                                                                                    |       |      |
|---------|--------|----------------------------------------------------------------------------------------------------|-------|------|
| H1FX    | Q92522 | Histone H1x                                                                                        | 0.742 | 0.01 |
| MRPS10  | P82664 | 28S ribosomal protein S10, mitochondrial                                                           | 0.746 | 0.03 |
| NDFIP1  | Q9BT67 | NEDD4 family-interacting protein 1                                                                 | 0.748 | 0.03 |
| ADI1    | Q9BV57 | 1,2-dihydroxy-3-keto-5-methylthiopentene dioxygenase                                               | 0.751 | 0.01 |
| POLD2   | P49005 | DNA polymerase delta subunit 2                                                                     | 0.756 | 0.01 |
| MT1E    | P04732 | Metallothionein-1E                                                                                 | 0.760 | 0.04 |
| NDUFA5  | Q16718 | NADH dehydrogenase [ubiquinone] 1 alpha subcomplex subunit 5                                       | 0.761 | 0.01 |
| NDUFA12 | Q9UI09 | NADH dehydrogenase [ubiquinone] 1 alpha subcomplex subunit 12                                      | 0.770 | 0.02 |
| SDHA    | P31040 | Succinate dehydrogenase [ubiquinone] flavoprotein subunit, mitochondrial                           | 0.770 | 0.02 |
| NDUFC2  | O95298 | NADH dehydrogenase [ubiquinone] 1 subunit C2                                                       | 0.781 | 0.02 |
| HELLS   | Q9NRZ9 | Lymphoid-specific helicase                                                                         | 0.783 | 0.03 |
| CDCP1   | Q9H5V8 | CUB domain-containing protein 1                                                                    | 0.786 | 0.02 |
| COX7C   | P15954 | Cytochrome c oxidase subunit 7C, mitochondrial                                                     | 0.794 | 0.05 |
| SLC7A5  | Q01650 | Large neutral amino acids transporter small subunit 1                                              | 0.796 | 0.02 |
| ELP3    | Q9H9T3 | Elongator complex protein 3                                                                        | 0.797 | 0.02 |
| COA4    | Q9NYJ1 | Cytochrome c oxidase assembly factor 4 homolog, mitochondrial                                      | 0.801 | 0.05 |
| ASNS    | P08243 | Asparagine synthetase [glutamine-hydrolyzing]                                                      | 0.802 | 0.02 |
| UHRF1   | Q96T88 | E3 ubiquitin-protein ligase UHRF1                                                                  | 0.804 | 0.02 |
| DPYSL5  | Q9BPU6 | Dihydropyrimidinase-related protein 5                                                              | 0.804 | 0.05 |
| NDUFV2  | P19404 | NADH dehydrogenase [ubiquinone] flavoprotein 2, mitochondrial                                      | 0.805 | 0.03 |
| YES1    | P07947 | Tyrosine-protein kinase Yes;Proto-oncogene tyrosine-protein kinase Src;Tyrosine-protein kinase Fyn | 0.806 | 0.02 |
| CISD1   | Q9NZ45 | CDGSH iron-sulfur domain-containing protein 1                                                      | 0.811 | 0.02 |
| MRPS33  | Q9Y291 | 28S ribosomal protein S33, mitochondrial                                                           | 0.816 | 0.02 |
| SLC38A1 | Q9H2H9 | Sodium-coupled neutral amino acid transporter 1                                                    | 0.826 | 0.02 |
| SLC3A2  | P08195 | 4F2 cell-surface antigen heavy chain                                                               | 0.853 | 0.03 |
| NDUFS1  | P28331 | NADH-ubiquinone oxidoreductase 75 kDa subunit, mitochondrial                                       | 0.854 | 0.04 |



|        |        |                                                            |       |      |
|--------|--------|------------------------------------------------------------|-------|------|
| POLR2K | P53803 | DNA-directed RNA polymerases I, II, and III subunit RPABC4 | 0.856 | 0.04 |
| GNL3   | Q9BVP2 | Guanine nucleotide-binding protein-like 3                  | 0.858 | 0.03 |
| BUD31  | P41223 | Protein BUD31 homolog                                      | 0.860 | 0.05 |
| MRPS16 | Q9Y3D3 | 28S ribosomal protein S16, mitochondrial                   | 0.864 | 0.05 |
| SPINT1 | O43278 | Kunitz-type protease inhibitor 1                           | 0.871 | 0.05 |



**Table S2. 67 up-regulated proteins in MO treatment by two sample t-test.**

| Gene names | Protein IDs | Protein names                                                     | Fold change | q-value |
|------------|-------------|-------------------------------------------------------------------|-------------|---------|
| HMGCS1     | Q01581      | Hydroxymethylglutaryl-CoA synthase, cytoplasmic                   | 1.793       | 0.01    |
| NQO1       | P15559      | NAD(P)H dehydrogenase [quinone] 1                                 | 1.760       | 0.02    |
| LIPA       | P38571      | Lysosomal acid lipase/cholesterol ester hydrolase                 | 1.742       | 0.03    |
| SDHAF2     | Q9NX18      | Succinate dehydrogenase assembly factor 2, mitochondrial          | 1.628       | 0.02    |
| ALDH1A3    | P47895      | Aldehyde dehydrogenase family 1 member A3                         | 1.610       | 0.02    |
| FOSL1      | P15407      | Fos-related antigen 1                                             | 1.533       | 0.01    |
| FTTH1      | P02794      | Ferritin heavy chain;Ferritin heavy chain, N-terminally processed | 1.514       | 0.03    |
| GCLC       | P48506      | Glutamate--cysteine ligase catalytic subunit                      | 1.510       | 0.01    |
| G6PD       | P11413      | Glucose-6-phosphate 1-dehydrogenase                               | 1.497       | 0.02    |
| HMOX1      | P09601      | Heme oxygenase 1                                                  | 1.480       | 0.01    |
| FDFT1      | P37268      | Squalene synthase                                                 | 1.453       | 0.02    |
| GCLM       | P48507      | Glutamate--cysteine ligase regulatory subunit                     | 1.447       | 0.00    |
| DHCR7      | Q9UBM7      | 7-dehydrocholesterol reductase                                    | 1.414       | 0.02    |
| DHCR24     | Q15392      | Delta(24)-sterol reductase                                        | 1.402       | 0.01    |
| GDF15      | Q99988      | Growth/differentiation factor 15                                  | 1.399       | 0.02    |
| SCARB1     | Q8WTV0      | Scavenger receptor class B member 1                               | 1.399       | 0.02    |
| LGSN       | Q5TDP6      | Lengsin                                                           | 1.390       | 0.02    |
| ALDOA      | P04075      | Fructose-bisphosphate aldolase A                                  | 1.369       | 0.01    |
| HSP90AB4P  | Q58FF6      | Putative heat shock protein HSP 90-beta 4                         | 1.364       | 0.04    |
| SLC17A5    | Q9NRA2      | Sialin                                                            | 1.357       | 0.01    |
| COQ5       | Q5HYK3      | 2-methoxy-6-polyprenyl-1,4-benzoquinol methylase, mitochondrial   | 1.350       | 0.02    |
| ARHGEF7    | Q14155      | Rho guanine nucleotide exchange factor 7                          | 1.334       | 0.02    |
| AK4        | P27144      | Adenylate kinase 4, mitochondrial                                 | 1.330       | 0.02    |
| PLD3       | Q8IV08      | Phospholipase D3                                                  | 1.327       | 0.01    |



|          |        |                                                                                                                  |       |      |
|----------|--------|------------------------------------------------------------------------------------------------------------------|-------|------|
| HPCAL1   | P37235 | Hippocalcin-like protein 1                                                                                       | 1.316 | 0.02 |
| POTEJ    | P0CG39 | POTE ankyrin domain family member J                                                                              | 1.315 | 0.02 |
| ACTN4    | O43707 | Alpha-actinin-4                                                                                                  | 1.307 | 0.03 |
| ERRFI1   | Q9UJM3 | ERBB receptor feedback inhibitor 1                                                                               | 1.300 | 0.02 |
| UGDH     | O60701 | UDP-glucose 6-dehydrogenase                                                                                      | 1.294 | 0.01 |
| TMEM161A | Q9NX61 | Transmembrane protein 161A                                                                                       | 1.293 | 0.03 |
| LMNA     | P02545 | Prelamin-A/C;Lamin-A/C                                                                                           | 1.285 | 0.02 |
| RRM2     | P31350 | Ribonucleoside-diphosphate reductase subunit M2                                                                  | 1.266 | 0.01 |
| SFN      | P31947 | 14-3-3 protein sigma                                                                                             | 1.265 | 0.05 |
| IDI1     | Q13907 | Isopentenyl-diphosphate Delta-isomerase 1                                                                        | 1.265 | 0.03 |
| PSAP     | P07602 | Prosaposin;Saposin-A;Saposin-B-Val;Saposin-B;Saposin-C;Saposin-D                                                 | 1.258 | 0.02 |
| TXN      | P10599 | Thioredoxin                                                                                                      | 1.256 | 0.02 |
| UBE2C    | O00762 | Ubiquitin-conjugating enzyme E2 C                                                                                | 1.248 | 0.02 |
| CTSA     | P10619 | Lysosomal protective protein;Lysosomal protective protein 32 kDa chain;Lysosomal protective protein 20 kDa chain | 1.248 | 0.04 |
| ALDH3A2  | P51648 | Fatty aldehyde dehydrogenase                                                                                     | 1.245 | 0.05 |
| GPRIN3   | Q6ZVF9 | G protein-regulated inducer of neurite outgrowth 3                                                               | 1.241 | 0.03 |
| DHRS4    | Q9BTZ2 | Dehydrogenase/reductase SDR family member 4                                                                      | 1.237 | 0.05 |
| NAMPT    | P43490 | Nicotinamide phosphoribosyltransferase                                                                           | 1.236 | 0.02 |
| SLC2A1   | P11166 | Solute carrier family 2, facilitated glucose transporter member 1                                                | 1.236 | 0.03 |
| ACAT2    | Q9BWD1 | Acetyl-CoA acetyltransferase, cytosolic                                                                          | 1.227 | 0.02 |
| FDXR     | P22570 | NADPH:adrenodoxin oxidoreductase, mitochondrial                                                                  | 1.226 | 0.03 |
| MSMO1    | Q15800 | Methylsterol monooxygenase 1                                                                                     | 1.224 | 0.02 |
| CTSZ     | Q9UBR2 | Cathepsin Z                                                                                                      | 1.222 | 0.05 |
| CA2      | P00918 | Carbonic anhydrase 2                                                                                             | 1.221 | 0.02 |
| GPC1     | P35052 | Glypican-1;Secreted glypican-1                                                                                   | 1.218 | 0.02 |



|          |        |                                                                              |       |      |
|----------|--------|------------------------------------------------------------------------------|-------|------|
| PCYT2    | Q99447 | Ethanolamine-phosphate cytidyltransferase                                    | 1.218 | 0.03 |
| CTSD     | P07339 | Cathepsin D;Cathepsin D light chain;Cathepsin D heavy chain                  | 1.213 | 0.02 |
| SERPINB1 | P30740 | Leukocyte elastase inhibitor                                                 | 1.211 | 0.02 |
| ENO2     | P09104 | Gamma-enolase                                                                | 1.202 | 0.04 |
| PHPT1    | Q9NRX4 | 14 kDa phosphohistidine phosphatase                                          | 1.201 | 0.04 |
| EIF1B    | O60739 | Eukaryotic translation initiation factor 1b                                  | 1.200 | 0.02 |
| STT3B    | Q8TCJ2 | Dolichyl-diphosphooligosaccharide--protein glycosyltransferase subunit STT3B | 1.196 | 0.05 |
| BLVRB    | P30043 | Flavin reductase (NADPH)                                                     | 1.196 | 0.02 |
| RPA2     | P15927 | Replication protein A 32 kDa subunit                                         | 1.191 | 0.03 |
| RDH11    | Q8TC12 | Retinol dehydrogenase 11                                                     | 1.186 | 0.04 |
| PGM5     | Q15124 | Phosphoglucomutase-like protein 5                                            | 1.183 | 0.04 |
| MGST1    | P10620 | Microsomal glutathione S-transferase 1                                       | 1.182 | 0.02 |
| FSCN1    | Q16658 | Fascin                                                                       | 1.170 | 0.03 |
| SH3KBP1  | Q96B97 | SH3 domain-containing kinase-binding protein 1                               | 1.165 | 0.04 |
| ALDH2    | P05091 | Aldehyde dehydrogenase, mitochondrial                                        | 1.163 | 0.04 |
| EPT1     | Q9C0D9 | Ethanolaminephosphotransferase 1                                             | 1.162 | 0.03 |
| RRM2B    | Q7LG56 | Ribonucleoside-diphosphate reductase subunit M2 B                            | 1.158 | 0.05 |
| RMDN1    | Q96DB5 | Regulator of microtubule dynamics protein 1                                  | 1.128 | 0.05 |



**Table S3. Nine groups enriched pathways of Metascape analysis of down-regulated proteins in MO treatment.** Pathways were enriched from GO Biological Processes, Reactome, KEGG, Canonical pathways and WikiPathways.

| Group ID | Category                | Term          | Description                                            | LogP   | Log (q-value) | InTerm<br>_InList | Genes                                                                                                                                                     |
|----------|-------------------------|---------------|--------------------------------------------------------|--------|---------------|-------------------|-----------------------------------------------------------------------------------------------------------------------------------------------------------|
| 1        | Reactome Gene Sets      | R-HSA-611105  | Respiratory electron transport                         | -35.13 | -30.83        | 20/103            | COX7C, ND1, NDUFA2, NDUFA5, NDUFA10, NDUFB3, NDUFB4, NDUFB8, NDUFC1, NDUFC2, NDUFS1, NDUFV1, NDUFS5, NDUFS6, NDUFV2, SDHA, SDHB, NDUFA12, NDUFA11, NDUFS7 |
| 1        | GO Biological Processes | GO:0022904    | respiratory electron transport chain                   | -33.92 | -29.92        | 20/117            | COX7C, ND1, NDUFA2, NDUFA5, NDUFA10, NDUFB3, NDUFB4, NDUFB8, NDUFC1, NDUFC2, NDUFS1, NDUFV1, NDUFS5, NDUFS6, NDUFV2, SDHA, SDHB, NDUFA12, NDUFA11, NDUFS7 |
| 1        | GO Biological Processes | GO:0006120    | mitochondrial electron transport, NADH to ubiquinone   | -33.60 | -29.78        | 17/55             | ND1, NDUFA2, NDUFA5, NDUFA10, NDUFB3, NDUFB4, NDUFB8, NDUFC1, NDUFC2, NDUFS1, NDUFV1, NDUFS5, NDUFS6, NDUFV2, NDUFA12, NDUFA11, NDUFS7                    |
| 1        | Reactome Gene Sets      | R-HSA-6799198 | Complex I biogenesis                                   | -33.29 | -29.66        | 17/57             | ND1, NDUFA2, NDUFA5, NDUFA10, NDUFB3, NDUFB4, NDUFB8, NDUFC1, NDUFC2, NDUFS1, NDUFV1, NDUFS5, NDUFS6, NDUFV2, NDUFA12, NDUFA11, NDUFS7                    |
| 1        | GO Biological Processes | GO:0042775    | mitochondrial ATP synthesis coupled electron transport | -33.20 | -29.66        | 19/99             | COX7C, ND1, NDUFA2, NDUFA5, NDUFA10, NDUFB3, NDUFB4, NDUFB8, NDUFC1, NDUFC2, NDUFS1, NDUFV1, NDUFS5, NDUFS6, NDUFV2, SDHA, NDUFA12,                       |



|   |                         |              |                                                                                                                     |        |        |        |                                                                                                                                                           |
|---|-------------------------|--------------|---------------------------------------------------------------------------------------------------------------------|--------|--------|--------|-----------------------------------------------------------------------------------------------------------------------------------------------------------|
|   |                         |              |                                                                                                                     |        |        |        | NDUFA11, NDUFS7                                                                                                                                           |
| 1 | Reactome Gene Sets      | R-HSA-163200 | Respiratory electron transport, ATP synthesis by chemiosmotic coupling, and heat production by uncoupling proteins. | -33.15 | -29.66 | 20/127 | COX7C, ND1, NDUFA2, NDUFA5, NDUFA10, NDUFB3, NDUFB4, NDUFB8, NDUFC1, NDUFC2, NDUFS1, NDUFV1, NDUFS5, NDUFS6, NDUFV2, SDHA, SDHB, NDUFA12, NDUFA11, NDUFS7 |
| 1 | GO Biological Processes | GO:0042773   | ATP synthesis coupled electron transport                                                                            | -33.11 | -29.66 | 19/100 | COX7C, ND1, NDUFA2, NDUFA5, NDUFA10, NDUFB3, NDUFB4, NDUFB8, NDUFC1, NDUFC2, NDUFS1, NDUFV1, NDUFS5, NDUFS6, NDUFV2, SDHA, NDUFA12, NDUFA11, NDUFS7       |
| 1 | KEGG Pathway            | hsa00190     | Oxidative phosphorylation                                                                                           | -32.72 | -29.37 | 20/133 | COX7C, ND1, NDUFA2, NDUFA5, NDUFA10, NDUFB3, NDUFB4, NDUFB8, NDUFC1, NDUFC2, NDUFS1, NDUFV1, NDUFS5, NDUFS6, NDUFV2, SDHA, SDHB, NDUFA12, NDUFA11, NDUFS7 |
| 1 | KEGG Pathway            | ko00190      | Oxidative phosphorylation                                                                                           | -32.72 | -29.37 | 20/133 | COX7C, ND1, NDUFA2, NDUFA5, NDUFA10, NDUFB3, NDUFB4, NDUFB8, NDUFC1, NDUFC2, NDUFS1, NDUFV1, NDUFS5, NDUFS6, NDUFV2, SDHA, SDHB, NDUFA12, NDUFA11, NDUFS7 |
| 1 | WikiPathways            | WP111        | Electron Transport Chain (OXPHOS system in mitochondria)                                                            | -32.59 | -29.29 | 19/106 | COX7C, ND1, NDUFA2, NDUFA5, NDUFA10, NDUFB3, NDUFB4, NDUFB8, NDUFC1, NDUFC2, NDUFS1, NDUFV1, NDUFS5, NDUFS6, NDUFV2, SDHA, SDHB, NDUFA12, NDUFS7          |



|   |                         |            |                                                    |        |        |        |                                                                                                                                                                    |
|---|-------------------------|------------|----------------------------------------------------|--------|--------|--------|--------------------------------------------------------------------------------------------------------------------------------------------------------------------|
| 1 | GO Biological Processes | GO:0010257 | NADH dehydrogenase complex assembly                | -32.17 | -28.95 | 17/65  | ND1, NDUFA2, NDUFA5, NDUFA10, NDUFB3, NDUFB4, NDUFB8, NDUFC1, NDUFC2, NDUFS1, NDUFV1, NDUFS5, NDUFS6, NDUFV2, NDUFA12, NDUFA11, NDUFS7                             |
| 1 | GO Biological Processes | GO:0032981 | mitochondrial respiratory chain complex I assembly | -32.17 | -28.95 | 17/65  | ND1, NDUFA2, NDUFA5, NDUFA10, NDUFB3, NDUFB4, NDUFB8, NDUFC1, NDUFC2, NDUFS1, NDUFV1, NDUFS5, NDUFS6, NDUFV2, NDUFA12, NDUFA11, NDUFS7                             |
| 1 | KEGG Pathway            | hsa05012   | Parkinson's disease                                | -32.11 | -28.92 | 20/142 | COX7C, ND1, NDUFA2, NDUFA5, NDUFA10, NDUFB3, NDUFB4, NDUFB8, NDUFC1, NDUFC2, NDUFS1, NDUFV1, NDUFS5, NDUFS6, NDUFV2, SDHA, SDHB, NDUFA12, NDUFA11, NDUFS7          |
| 1 | GO Biological Processes | GO:0045333 | cellular respiration                               | -31.60 | -28.45 | 21/187 | COX7C, ND1, NDUFA2, NDUFA5, NDUFA10, NDUFB3, NDUFB4, NDUFB8, NDUFC1, NDUFC2, NDUFS1, NDUFV1, NDUFS5, NDUFS6, NDUFV2, SDHA, SDHB, CISD1, NDUFA12, NDUFA11, NDUFS7   |
| 1 | KEGG Pathway            | hsa05016   | Huntington's disease                               | -31.30 | -28.21 | 21/193 | COX7C, GPX1, NDUFA2, NDUFA5, NDUFA10, NDUFB3, NDUFB4, NDUFB8, NDUFC1, NDUFC2, NDUFS1, NDUFV1, NDUFS5, NDUFS6, NDUFV2, POLR2K, SDHA, SDHB, NDUFA12, NDUFA11, NDUFS7 |
| 1 | KEGG Pathway            | ko05016    | Huntington's disease                               | -31.30 | -28.21 | 21/193 | COX7C, GPX1, NDUFA2, NDUFA5, NDUFA10, NDUFB3, NDUFB4, NDUFB8, NDUFC1, NDUFC2, NDUFS1, NDUFV1, NDUFS5,                                                              |



|   |                         |               |                                                                   |        |        |        |                                                                                                                                                                       |
|---|-------------------------|---------------|-------------------------------------------------------------------|--------|--------|--------|-----------------------------------------------------------------------------------------------------------------------------------------------------------------------|
|   |                         |               |                                                                   |        |        |        | NDUFS6, NDUFV2, POLR2K, SDHA, SDHB,<br>NDUFA12, NDUFA11, NDUFS7                                                                                                       |
| 1 | GO Biological Processes | GO:0033108    | mitochondrial respiratory chain<br>complex assembly               | -30.77 | -27.70 | 18/101 | ND1, NDUFA2, NDUFA5, NDUFA10, NDUFB3,<br>NDUFB4, NDUFB8, NDUFC1, NDUFC2,<br>NDUFS1, NDUFV1, NDUFS5, NDUFS6,<br>NDUFV2, COA4, NDUFA12, NDUFA11,<br>NDUFS7              |
| 1 | GO Biological Processes | GO:0022900    | electron transport chain                                          | -30.04 | -27.02 | 20/178 | COX7C, ND1, NDUFA2, NDUFA5, NDUFA10,<br>NDUFB3, NDUFB4, NDUFB8, NDUFC1,<br>NDUFC2, NDUFS1, NDUFV1, NDUFS5,<br>NDUFS6, NDUFV2, SDHA, SDHB, NDUFA12,<br>NDUFA11, NDUFS7 |
| 1 | Reactome Gene Sets      | R-HSA-1428517 | The citric acid (TCA) cycle and<br>respiratory electron transport | -30.04 | -27.02 | 20/178 | COX7C, ND1, NDUFA2, NDUFA5, NDUFA10,<br>NDUFB3, NDUFB4, NDUFB8, NDUFC1,<br>NDUFC2, NDUFS1, NDUFV1, NDUFS5,<br>NDUFS6, NDUFV2, SDHA, SDHB, NDUFA12,<br>NDUFA11, NDUFS7 |
| 1 | GO Biological Processes | GO:0006119    | oxidative phosphorylation                                         | -29.63 | -26.64 | 19/148 | COX7C, ND1, NDUFA2, NDUFA5, NDUFA10,<br>NDUFB3, NDUFB4, NDUFB8, NDUFC1,<br>NDUFC2, NDUFS1, NDUFV1, NDUFS5,<br>NDUFS6, NDUFV2, SDHA, NDUFA12,<br>NDUFA11, NDUFS7       |
| 1 | KEGG Pathway            | ko04932       | Non-alcoholic fatty liver disease<br>(NAFLD)                      | -29.57 | -26.60 | 19/149 | COX7C, NDUFA2, NDUFA5, NDUFA10,<br>NDUFB3, NDUFB4, NDUFB8, NDUFC1,<br>NDUFC2, NDUFS1, NDUFV1, NDUFS5,<br>NDUFS6, NDUFV2, SDHA, SDHB, NDUFA12,                         |



|   |                         |            |                                                      |        |        |        |                                                                                                                                                      |
|---|-------------------------|------------|------------------------------------------------------|--------|--------|--------|------------------------------------------------------------------------------------------------------------------------------------------------------|
|   |                         |            |                                                      |        |        |        | NDUFA11, NDUF57                                                                                                                                      |
| 1 | WikiPathways            | WP4396     | Nonalcoholic fatty liver disease                     | -28.95 | -26.00 | 19/160 | COX7C, NDUFA2, NDUFA5, NDUFA10, NDUFB3, NDUFB4, NDUFB8, NDUFC1, NDUFC2, NDUF51, NDUFV1, NDUF55, NDUF56, NDUFV2, SDHA, SDHB, NDUFA12, NDUFA11, NDUF57 |
| 1 | WikiPathways            | WP4324     | Mitochondrial complex I assembly model OXPHOS system | -28.50 | -25.57 | 15/56  | ND1, NDUFA2, NDUFA5, NDUFA10, NDUFB3, NDUFB4, NDUFB8, NDUFC1, NDUFC2, NDUF51, NDUFV1, NDUF55, NDUF56, NDUFV2, NDUFA12                                |
| 1 | KEGG Pathway            | hsa04932   | Non-alcoholic fatty liver disease (NAFLD)            | -28.48 | -25.56 | 19/169 | COX7C, NDUFA2, NDUFA5, NDUFA10, NDUFB3, NDUFB4, NDUFB8, NDUFC1, NDUFC2, NDUF51, NDUFV1, NDUF55, NDUF56, NDUFV2, SDHA, SDHB, NDUFA12, NDUFA11, NDUF57 |
| 1 | KEGG Pathway            | hsa05010   | Alzheimer's disease                                  | -28.38 | -25.50 | 19/171 | COX7C, NDUFA2, NDUFA5, NDUFA10, NDUFB3, NDUFB4, NDUFB8, NDUFC1, NDUFC2, NDUF51, NDUFV1, NDUF55, NDUF56, NDUFV2, SDHA, SDHB, NDUFA12, NDUFA11, NDUF57 |
| 1 | KEGG Pathway            | ko05010    | Alzheimer's disease                                  | -28.38 | -25.50 | 19/171 | COX7C, NDUFA2, NDUFA5, NDUFA10, NDUFB3, NDUFB4, NDUFB8, NDUFC1, NDUFC2, NDUF51, NDUFV1, NDUF55, NDUF56, NDUFV2, SDHA, SDHB, NDUFA12, NDUFA11, NDUF57 |
| 1 | GO Biological Processes | GO:0015980 | energy derivation by oxidation of                    | -27.86 | -24.99 | 21/278 | COX7C, ND1, NDUFA2, NDUFA5, NDUFA10,                                                                                                                 |



|   |                         |            |                                                   |        |        |        |                                                                                                                                                                                          |
|---|-------------------------|------------|---------------------------------------------------|--------|--------|--------|------------------------------------------------------------------------------------------------------------------------------------------------------------------------------------------|
|   |                         |            | organic compounds                                 |        |        |        | NDUFB3, NDUFB4, NDUFB8, NDUF1C1,<br>NDUF1C2, NDUF1S1, NDUFV1, NDUF1S5,<br>NDUF1S6, NDUFV2, SDHA, SDHB, CISD1,<br>NDUFA12, NDUFA11, NDUF1S7                                               |
| 1 | WikiPathways            | WP623      | Oxidative phosphorylation                         | -27.75 | -24.90 | 15/62  | ND1, NDUFA2, NDUFA5, NDUFA10, NDUFB4,<br>NDUFB8, NDUF1C1, NDUF1C2, NDUF1S1,<br>NDUFV1, NDUF1S5, NDUF1S6, NDUFV2,<br>NDUFA11, NDUF1S7                                                     |
| 1 | KEGG Pathway            | hsa04723   | Retrograde endocannabinoid<br>signaling           | -24.63 | -21.79 | 17/167 | ND1, NDUFA2, NDUFA5, NDUFA10, NDUFB3,<br>NDUFB4, NDUFB8, NDUF1C1, NDUF1C2,<br>NDUF1S1, NDUFV1, NDUF1S5, NDUF1S6,<br>NDUFV2, NDUFA12, NDUFA11, NDUF1S7                                    |
| 1 | GO Biological Processes | GO:0006091 | generation of precursor<br>metabolites and energy | -23.60 | -20.78 | 22/524 | COX7C, FECH, ND1, NDUFA2, NDUFA5,<br>NDUFA10, NDUFB3, NDUFB4, NDUFB8,<br>NDUF1C1, NDUF1C2, NDUF1S1, NDUFV1,<br>NDUF1S5, NDUF1S6, NDUFV2, SDHA, SDHB,<br>CISD1, NDUFA12, NDUFA11, NDUF1S7 |
| 1 | GO Biological Processes | GO:0046034 | ATP metabolic process                             | -23.26 | -20.45 | 19/313 | COX7C, ND1, NDUFA2, NDUFA5, NDUFA10,<br>NDUFB3, NDUFB4, NDUFB8, NDUF1C1,<br>NDUF1C2, NDUF1S1, NDUFV1, NDUF1S5,<br>NDUF1S6, NDUFV2, SDHA, NDUFA12,<br>NDUFA11, NDUF1S7                    |
| 1 | GO Biological Processes | GO:0007005 | mitochondrion organization                        | -20.13 | -17.33 | 20/548 | GPX1, ND1, NDUFA2, NDUFA5, NDUFA10,<br>NDUFB3, NDUFB4, NDUFB8, NDUF1C1,<br>NDUF1C2, NDUF1S1, NDUFV1, NDUF1S5,<br>NDUF1S6, NDUFV2, COA4, NDUFA12,                                         |



|   |                         |              |                                                                     |       |       |       |                                 |
|---|-------------------------|--------------|---------------------------------------------------------------------|-------|-------|-------|---------------------------------|
|   |                         |              |                                                                     |       |       |       | NDUFA11, NDUF57, TIMM23         |
| 2 | GO Biological Processes | GO:0009060   | aerobic respiration                                                 | -6.18 | -3.40 | 5/86  | COX7C, ND1, SDHA, SDHB, NDUF57  |
| 2 | KEGG Pathway            | hsa00020     | Citrate cycle (TCA cycle)                                           | -4.58 | -1.83 | 3/30  | PCK2, SDHA, SDHB                |
| 2 | KEGG Pathway            | ko00020      | Citrate cycle (TCA cycle)                                           | -4.58 | -1.83 | 3/30  | PCK2, SDHA, SDHB                |
| 2 | GO Biological Processes | GO:0043648   | dicarboxylic acid metabolic process                                 | -3.06 | -0.56 | 3/97  | PCK2, SDHA, SDHB                |
| 3 | Reactome Gene Sets      | R-HSA-352230 | Amino acid transport across the plasma membrane                     | -4.46 | -1.72 | 3/33  | SLC3A2, SLC7A5, SLC38A1         |
| 3 | Reactome Gene Sets      | R-HSA-425393 | Transport of inorganic cations/anions and amino acids/oligopeptides | -4.25 | -1.54 | 4/108 | SLC3A2, SLC7A5, SLC4A7, SLC38A1 |
| 3 | GO Biological Processes | GO:0015804   | neutral amino acid transport                                        | -4.08 | -1.38 | 3/44  | SLC3A2, SLC7A5, SLC38A1         |
| 3 | KEGG Pathway            | hsa04216     | Ferroptosis                                                         | -4.02 | -1.35 | 3/46  | GPX4, SLC3A2, SLC38A1           |
| 3 | GO Biological Processes | GO:1902475   | L-alpha-amino acid transmembrane transport                          | -3.61 | -0.96 | 3/63  | SLC3A2, SLC7A5, SLC38A1         |
| 3 | GO Biological Processes | GO:0015807   | L-amino acid transport                                              | -3.55 | -0.94 | 3/66  | SLC3A2, SLC7A5, SLC38A1         |
| 3 | GO Biological Processes | GO:0003333   | amino acid transmembrane transport                                  | -3.08 | -0.56 | 3/96  | SLC3A2, SLC7A5, SLC38A1         |
| 3 | GO Biological Processes | GO:0003018   | vascular process in circulatory system                              | -2.90 | -0.44 | 4/245 | GPX1, YES1, SLC7A5, SLC38A1     |
| 3 | Reactome Gene Sets      | R-HSA-425407 | SLC-mediated transmembrane transport                                | -2.86 | -0.42 | 4/251 | SLC3A2, SLC7A5, SLC4A7, SLC38A1 |
| 3 | Reactome Gene Sets      | R-HSA-202733 | Cell surface interactions at the vascular wall                      | -2.63 | -0.22 | 3/137 | SLC3A2, YES1, SLC7A5            |
| 3 | GO Biological Processes | GO:0006865   | amino acid transport                                                | -2.50 | -0.11 | 3/153 | SLC3A2, SLC7A5, SLC38A1         |
| 3 | GO Biological Processes | GO:1905039   | carboxylic acid transmembrane                                       | -2.49 | -0.11 | 3/154 | SLC3A2, SLC7A5, SLC38A1         |



|   |                         |               |                                           |       |       |       |                                         |
|---|-------------------------|---------------|-------------------------------------------|-------|-------|-------|-----------------------------------------|
|   |                         |               | transport                                 |       |       |       |                                         |
| 3 | GO Biological Processes | GO:1903825    | organic acid transmembrane transport      | -2.48 | -0.11 | 3/155 | SLC3A2, SLC7A5, SLC38A1                 |
| 3 | GO Biological Processes | GO:0098656    | anion transmembrane transport             | -2.40 | -0.06 | 5/549 | SLC3A2, SLC7A5, SLC4A7, SLC38A1, TIMM23 |
| 3 | Reactome Gene Sets      | R-HSA-71291   | Metabolism of amino acids and derivatives | -2.24 | 0.00  | 4/374 | ASNS, SLC3A2, SLC7A5, ADI1              |
| 3 | GO Biological Processes | GO:0015711    | organic anion transport                   | -2.23 | 0.00  | 4/377 | SLC3A2, SLC7A5, SLC4A7, SLC38A1         |
| 3 | GO Biological Processes | GO:0098657    | import into cell                          | -2.01 | 0.00  | 3/230 | SLC3A2, SLC7A5, SLC38A1                 |
| 4 | GO Biological Processes | GO:0006415    | translational termination                 | -4.30 | -1.57 | 4/105 | ABCE1, MRPS16, MRPS33, MRPS10           |
| 4 | Reactome Gene Sets      | R-HSA-5368286 | Mitochondrial translation initiation      | -3.20 | -0.65 | 3/87  | MRPS16, MRPS33, MRPS10                  |
| 4 | Reactome Gene Sets      | R-HSA-5389840 | Mitochondrial translation elongation      | -3.20 | -0.65 | 3/87  | MRPS16, MRPS33, MRPS10                  |
| 4 | Reactome Gene Sets      | R-HSA-5419276 | Mitochondrial translation termination     | -3.20 | -0.65 | 3/87  | MRPS16, MRPS33, MRPS10                  |
| 4 | GO Biological Processes | GO:0070125    | mitochondrial translational elongation    | -3.17 | -0.65 | 3/89  | MRPS16, MRPS33, MRPS10                  |
| 4 | GO Biological Processes | GO:0070126    | mitochondrial translational termination   | -3.17 | -0.65 | 3/89  | MRPS16, MRPS33, MRPS10                  |
| 4 | Reactome Gene Sets      | R-HSA-5368287 | Mitochondrial translation                 | -3.12 | -0.60 | 3/93  | MRPS16, MRPS33, MRPS10                  |
| 4 | GO Biological Processes | GO:0043624    | cellular protein complex disassembly      | -3.06 | -0.56 | 4/222 | ABCE1, MRPS16, MRPS33, MRPS10           |
| 4 | GO Biological Processes | GO:0032543    | mitochondrial translation                 | -2.66 | -0.23 | 3/134 | MRPS16, MRPS33, MRPS10                  |
| 4 | GO Biological Processes | GO:0006414    | translational elongation                  | -2.65 | -0.23 | 3/135 | MRPS16, MRPS33, MRPS10                  |
| 4 | GO Biological Processes | GO:0032984    | protein-containing complex disassembly    | -2.41 | -0.06 | 4/334 | ABCE1, MRPS16, MRPS33, MRPS10           |



|   |                         |               |                                                                         |       |       |       |                                  |
|---|-------------------------|---------------|-------------------------------------------------------------------------|-------|-------|-------|----------------------------------|
| 4 | GO Biological Processes | GO:0140053    | mitochondrial gene expression                                           | -2.41 | -0.06 | 3/165 | MRPS16, MRPS33, MRPS10           |
| 5 | GO Biological Processes | GO:0045910    | negative regulation of DNA recombination                                | -4.08 | -1.38 | 3/44  | H1-2, H1-10, NDFIP1              |
| 5 | GO Biological Processes | GO:0045815    | positive regulation of gene expression, epigenetic                      | -3.72 | -1.06 | 3/58  | H1-2, POLR2K, H1-10              |
| 5 | GO Biological Processes | GO:0040029    | regulation of gene expression, epigenetic                               | -3.19 | -0.65 | 4/205 | GPX1, H1-2, POLR2K, H1-10        |
| 5 | GO Biological Processes | GO:0000018    | regulation of DNA recombination                                         | -2.98 | -0.50 | 3/104 | H1-2, H1-10, NDFIP1              |
| 5 | GO Biological Processes | GO:0051053    | negative regulation of DNA metabolic process                            | -2.76 | -0.32 | 3/124 | H1-2, H1-10, NDFIP1              |
| 5 | GO Biological Processes | GO:0097549    | chromatin organization involved in negative regulation of transcription | -2.59 | -0.19 | 3/142 | H1-2, HELLS, H1-10               |
| 5 | GO Biological Processes | GO:0060968    | regulation of gene silencing                                            | -2.57 | -0.18 | 3/144 | H1-2, POLR2K, H1-10              |
| 5 | GO Biological Processes | GO:0034401    | chromatin organization involved in regulation of transcription          | -2.49 | -0.11 | 3/154 | H1-2, HELLS, H1-10               |
| 5 | GO Biological Processes | GO:0051052    | regulation of DNA metabolic process                                     | -2.32 | 0.00  | 4/355 | H1-2, H1-10, GNL3, NDFIP1        |
| 5 | GO Biological Processes | GO:0031497    | chromatin assembly                                                      | -2.20 | 0.00  | 3/196 | H1-2, HELLS, H1-10               |
| 5 | GO Biological Processes | GO:0006333    | chromatin assembly or disassembly                                       | -2.05 | 0.00  | 3/221 | H1-2, HELLS, H1-10               |
| 6 | GO Biological Processes | GO:0009636    | response to toxic substance                                             | -4.02 | -1.35 | 5/239 | ASNS, FECH, GPX1, GPX4, MT1E     |
| 6 | GO Biological Processes | GO:0006979    | response to oxidative stress                                            | -2.78 | -0.34 | 5/447 | GPX1, GPX4, ND1, NDUFB4, NDUFA12 |
| 6 | GO Biological Processes | GO:0098754    | detoxification                                                          | -2.62 | -0.21 | 3/138 | GPX1, GPX4, MT1E                 |
| 6 | GO Biological Processes | GO:0009416    | response to light stimulus                                              | -2.48 | -0.11 | 4/320 | ASNS, FECH, GPX1, POLD3          |
| 7 | Reactome Gene Sets      | R-HSA-1268020 | Mitochondrial protein import                                            | -3.59 | -0.95 | 3/64  | NDUFB8, COA4, TIMM23             |



|   |                         |               |                                                           |       |       |       |                            |
|---|-------------------------|---------------|-----------------------------------------------------------|-------|-------|-------|----------------------------|
| 7 | Reactome Gene Sets      | R-HSA-9609507 | Protein localization                                      | -2.42 | -0.06 | 3/163 | NDUFB8, COA4, TIMM23       |
| 8 | Reactome Gene Sets      | R-HSA-6782210 | Gap-filling DNA repair synthesis and ligation in TC-NER   | -3.57 | -0.94 | 3/65  | POLD2, POLR2K, POLD3       |
| 8 | Reactome Gene Sets      | R-HSA-6782135 | Dual incision in TC-NER                                   | -3.55 | -0.94 | 3/66  | POLD2, POLR2K, POLD3       |
| 8 | KEGG Pathway            | hsa00230      | Purine metabolism                                         | -3.46 | -0.86 | 4/174 | POLD2, POLR2K, PPAT, POLD3 |
| 8 | KEGG Pathway            | ko00230       | Purine metabolism                                         | -3.46 | -0.86 | 4/174 | POLD2, POLR2K, PPAT, POLD3 |
| 8 | GO Biological Processes | GO:0006283    | transcription-coupled nucleotide-excision repair          | -3.42 | -0.83 | 3/73  | POLD2, POLR2K, POLD3       |
| 8 | Reactome Gene Sets      | R-HSA-6781827 | Transcription-Coupled Nucleotide Excision Repair (TC-NER) | -3.32 | -0.74 | 3/79  | POLD2, POLR2K, POLD3       |
| 8 | WikiPathways            | WP4022        | Pyrimidine metabolism                                     | -3.22 | -0.65 | 3/86  | POLD2, POLR2K, POLD3       |
| 8 | KEGG Pathway            | hsa00240      | Pyrimidine metabolism                                     | -2.98 | -0.50 | 3/104 | POLD2, POLR2K, POLD3       |
| 8 | KEGG Pathway            | ko00240       | Pyrimidine metabolism                                     | -2.98 | -0.50 | 3/104 | POLD2, POLR2K, POLD3       |
| 8 | GO Biological Processes | GO:0006289    | nucleotide-excision repair                                | -2.91 | -0.44 | 3/110 | POLD2, POLR2K, POLD3       |
| 8 | Reactome Gene Sets      | R-HSA-5696398 | Nucleotide Excision Repair                                | -2.89 | -0.44 | 3/111 | POLD2, POLR2K, POLD3       |
| 8 | Reactome Gene Sets      | R-HSA-157579  | Telomere Maintenance                                      | -2.87 | -0.42 | 3/113 | POLD2, POLR2K, POLD3       |
| 8 | Reactome Gene Sets      | R-HSA-73886   | Chromosome Maintenance                                    | -2.60 | -0.19 | 3/141 | POLD2, POLR2K, POLD3       |
| 8 | GO Biological Processes | GO:0000723    | telomere maintenance                                      | -2.43 | -0.07 | 3/161 | POLD2, POLD3, GNL3         |
| 8 | GO Biological Processes | GO:0032200    | telomere organization                                     | -2.34 | 0.00  | 3/174 | POLD2, POLD3, GNL3         |
| 9 | GO Biological Processes | GO:1901605    | alpha-amino acid metabolic process                        | -2.22 | 0.00  | 3/192 | ASNS, PPAT, ADI1           |
| 9 | GO Biological Processes | GO:0048732    | gland development                                         | -2.09 | 0.00  | 4/414 | ASNS, GPX1, PCK2, PPAT     |



**Table S4. Top ten groups enriched pathways of Metascape analysis of up-regulated proteins in MO treatment.** Pathways were enriched from GO Biological Processes, Reactome, KEGG, Canonical pathways and WikiPathways.

| Group ID | Category                | Term         | Description                                | LogP   | Log (q-value) | InTerm<br>_InList | Genes                                                                                                             |
|----------|-------------------------|--------------|--------------------------------------------|--------|---------------|-------------------|-------------------------------------------------------------------------------------------------------------------|
| 1        | GO Biological Processes | GO:0006066   | alcohol metabolic process                  | -14.02 | -9.73         | 15/373            | ACAT2, ALDH2, ALDH1A3, ALDH3A2, SCARB1, DHCR7, DHCR24, FDFT1, FDXR, G6PD, HMGCS1, IDI1, MSMO1, DHRS4, RDH11       |
| 1        | Reactome Gene Sets      | R-HSA-191273 | Cholesterol biosynthesis                   | -12.84 | -8.99         | 7/25              | ACAT2, DHCR7, DHCR24, FDFT1, HMGCS1, IDI1, MSMO1                                                                  |
| 1        | GO Biological Processes | GO:1901615   | organic hydroxy compound metabolic process | -12.73 | -8.99         | 16/555            | ACAT2, ALDH2, ALDH1A3, ALDH3A2, SCARB1, DHCR7, DHCR24, FDFT1, FDXR, G6PD, HMGCS1, IDI1, LIPA, MSMO1, DHRS4, RDH11 |
| 1        | GO Biological Processes | GO:0016125   | sterol metabolic process                   | -12.69 | -8.99         | 11/166            | ACAT2, SCARB1, DHCR7, DHCR24, FDFT1, FDXR, G6PD, HMGCS1, IDI1, LIPA, MSMO1                                        |
| 1        | GO Biological Processes | GO:0008203   | cholesterol metabolic process              | -11.59 | -7.99         | 10/150            | ACAT2, SCARB1, DHCR7, DHCR24, FDFT1, FDXR, G6PD, HMGCS1, IDI1, MSMO1                                              |
| 1        | GO Biological Processes | GO:1902652   | secondary alcohol metabolic process        | -11.33 | -7.81         | 10/159            | ACAT2, SCARB1, DHCR7, DHCR24, FDFT1, FDXR, G6PD, HMGCS1, IDI1, MSMO1                                              |
| 1        | GO Biological Processes | GO:0006695   | cholesterol biosynthetic process           | -11.10 | -7.71         | 8/73              | ACAT2, DHCR7, DHCR24, FDFT1, G6PD, HMGCS1, IDI1, MSMO1                                                            |
| 1        | GO Biological Processes | GO:1902653   | secondary alcohol biosynthetic process     | -11.10 | -7.71         | 8/73              | ACAT2, DHCR7, DHCR24, FDFT1, G6PD, HMGCS1, IDI1, MSMO1                                                            |
| 1        | GO Biological Processes | GO:0016126   | sterol biosynthetic process                | -10.82 | -7.47         | 8/79              | ACAT2, DHCR7, DHCR24, FDFT1, G6PD, HMGCS1, IDI1, MSMO1                                                            |



|   |                         |               |                                                                             |        |       |        |                                                                                                        |
|---|-------------------------|---------------|-----------------------------------------------------------------------------|--------|-------|--------|--------------------------------------------------------------------------------------------------------|
| 1 | GO Biological Processes | GO:0008202    | steroid metabolic process                                                   | -10.75 | -7.45 | 12/329 | ACAT2, SCARB1, DHCR7, DHCR24, FDFT1, FDXR, G6PD, HMGCS1, IDI1, LIPA, MSMO1, DHRS4                      |
| 1 | GO Biological Processes | GO:0006694    | steroid biosynthetic process                                                | -10.54 | -7.28 | 10/191 | ACAT2, SCARB1, DHCR7, DHCR24, FDFT1, FDXR, G6PD, HMGCS1, IDI1, MSMO1                                   |
| 1 | GO Biological Processes | GO:0044283    | small molecule biosynthetic process                                         | -10.17 | -6.97 | 15/693 | ACAT2, ALDH1A3, ALDOA, DHCR7, DHCR24, ENO2, FDFT1, FDXR, G6PD, HMGCS1, IDI1, MSMO1, UGDH, LGSN, COQ5   |
| 1 | WikiPathways            | WP197         | Cholesterol Biosynthesis Pathway                                            | -9.71  | -6.56 | 5/15   | DHCR7, FDFT1, HMGCS1, IDI1, MSMO1                                                                      |
| 1 | KEGG Pathway            | hsa00100      | Steroid biosynthesis                                                        | -9.01  | -5.91 | 5/20   | DHCR7, DHCR24, FDFT1, LIPA, MSMO1                                                                      |
| 1 | KEGG Pathway            | ko00100       | Steroid biosynthesis                                                        | -9.01  | -5.91 | 5/20   | DHCR7, DHCR24, FDFT1, LIPA, MSMO1                                                                      |
| 1 | WikiPathways            | WP4718        | Cholesterol metabolism (includes both Bloch and Kandutsch-Russell pathways) | -8.84  | -5.79 | 6/47   | DHCR7, DHCR24, FDFT1, HMGCS1, IDI1, MSMO1                                                              |
| 1 | GO Biological Processes | GO:0008610    | lipid biosynthetic process                                                  | -8.83  | -5.79 | 14/729 | ACAT2, ALDH1A3, ALDH3A2, SCARB1, DHCR7, DHCR24, FDFT1, FDXR, G6PD, HMGCS1, IDI1, PCYT2, MSMO1, SELENOI |
| 1 | Reactome Gene Sets      | R-HSA-556833  | Metabolism of lipids                                                        | -8.75  | -5.73 | 14/740 | ACAT2, ALDH3A2, DHCR7, DHCR24, FDFT1, FDXR, HMGCS1, IDI1, CTSA, PSAP, PCYT2, MSMO1, PLD3, SELENOI      |
| 1 | Reactome Gene Sets      | R-HSA-8957322 | Metabolism of steroids                                                      | -8.55  | -5.55 | 8/151  | ACAT2, DHCR7, DHCR24, FDFT1, FDXR, HMGCS1, IDI1, MSMO1                                                 |
| 1 | GO Biological Processes | GO:0046165    | alcohol biosynthetic process                                                | -8.44  | -5.50 | 8/156  | ACAT2, DHCR7, DHCR24, FDFT1, G6PD, HMGCS1, IDI1, MSMO1                                                 |
| 1 | GO Biological Processes | GO:1901617    | organic hydroxy compound biosynthetic process                               | -6.83  | -3.98 | 8/251  | ACAT2, DHCR7, DHCR24, FDFT1, G6PD, HMGCS1, IDI1, MSMO1                                                 |



|   |                         |               |                                                                      |       |       |      |                             |
|---|-------------------------|---------------|----------------------------------------------------------------------|-------|-------|------|-----------------------------|
| 1 | KEGG Pathway            | M00095        | C5 isoprenoid biosynthesis,<br>mevalonate pathway                    | -5.82 | -3.12 | 3/10 | ACAT2, HMGCS1, IDI1         |
| 1 | KEGG Pathway            | hsa_M00095    | C5 isoprenoid biosynthesis,<br>mevalonate pathway                    | -5.82 | -3.12 | 3/10 | ACAT2, HMGCS1, IDI1         |
| 1 | KEGG Pathway            | M00101        | Cholesterol biosynthesis, squalene<br>2,3-epoxide => cholesterol     | -5.68 | -3.01 | 3/11 | DHCR7, DHCR24, MSMO1        |
| 1 | KEGG Pathway            | hsa_M00101    | Cholesterol biosynthesis, squalene<br>2,3-epoxide => cholesterol     | -5.68 | -3.01 | 3/11 | DHCR7, DHCR24, MSMO1        |
| 1 | Reactome Gene Sets      | R-HSA-2426168 | Activation of gene expression by<br>SREBF (SREBP)                    | -5.51 | -2.88 | 4/42 | DHCR7, FDFT1, HMGCS1, IDI1  |
| 1 | GO Biological Processes | GO:0045540    | regulation of cholesterol<br>biosynthetic process                    | -5.24 | -2.66 | 4/49 | DHCR7, FDFT1, HMGCS1, IDI1  |
| 1 | GO Biological Processes | GO:0106118    | regulation of sterol biosynthetic<br>process                         | -5.24 | -2.66 | 4/49 | DHCR7, FDFT1, HMGCS1, IDI1  |
| 1 | Reactome Gene Sets      | R-HSA-1655829 | Regulation of cholesterol<br>biosynthesis by SREBP (SREBF)           | -5.04 | -2.49 | 4/55 | DHCR7, FDFT1, HMGCS1, IDI1  |
| 1 | GO Biological Processes | GO:0090181    | regulation of cholesterol metabolic<br>process                       | -4.83 | -2.31 | 4/62 | DHCR7, FDFT1, HMGCS1, IDI1  |
| 1 | KEGG Pathway            | hsa00900      | Terpenoid backbone biosynthesis                                      | -4.72 | -2.24 | 3/22 | ACAT2, HMGCS1, IDI1         |
| 1 | KEGG Pathway            | ko00900       | Terpenoid backbone biosynthesis                                      | -4.72 | -2.24 | 3/22 | ACAT2, HMGCS1, IDI1         |
| 1 | WikiPathways            | WP1982        | Sterol Regulatory Element-<br>Binding Proteins (SREBP)<br>signalling | -4.55 | -2.16 | 4/73 | SCARB1, FDFT1, HMGCS1, IDI1 |
| 1 | GO Biological Processes | GO:1902930    | regulation of alcohol biosynthetic<br>process                        | -4.48 | -2.10 | 4/76 | DHCR7, FDFT1, HMGCS1, IDI1  |
| 1 | GO Biological Processes | GO:0008299    | isoprenoid biosynthetic process                                      | -4.39 | -2.03 | 3/28 | ALDH1A3, HMGCS1, IDI1       |



|   |                         |            |                                                |        |       |        |                                                                    |
|---|-------------------------|------------|------------------------------------------------|--------|-------|--------|--------------------------------------------------------------------|
| 1 | GO Biological Processes | GO:0050810 | regulation of steroid biosynthetic process     | -4.16  | -1.82 | 4/92   | DHCR7, FDFT1, HMGCS1, IDI1                                         |
| 1 | GO Biological Processes | GO:0046890 | regulation of lipid biosynthetic process       | -3.90  | -1.64 | 5/203  | SCARB1, DHCR7, FDFT1, HMGCS1, IDI1                                 |
| 1 | GO Biological Processes | GO:0019218 | regulation of steroid metabolic process        | -3.68  | -1.49 | 4/122  | DHCR7, FDFT1, HMGCS1, IDI1                                         |
| 1 | GO Biological Processes | GO:0019216 | regulation of lipid metabolic process          | -3.41  | -1.28 | 6/402  | SCARB1, DHCR7, FDFT1, HMGCS1, IDI1, PSAP                           |
| 1 | GO Biological Processes | GO:0006644 | phospholipid metabolic process                 | -3.31  | -1.19 | 6/420  | SCARB1, FDFT1, HMGCS1, IDI1, PCYT2, SELENOI                        |
| 1 | GO Biological Processes | GO:0062012 | regulation of small molecule metabolic process | -3.21  | -1.12 | 6/438  | AK4, DHCR7, NQO1, FDFT1, HMGCS1, IDI1                              |
| 1 | GO Biological Processes | GO:0008654 | phospholipid biosynthetic process              | -2.41  | -0.45 | 4/269  | HMGCS1, IDI1, PCYT2, SELENOI                                       |
| 2 | WikiPathways            | WP2884     | NRF2 pathway                                   | -10.16 | -6.97 | 9/146  | BLVRB, NQO1, FTH1, G6PD, GCLC, GCLM, HMOX1, SLC2A1, TXN            |
| 2 | WikiPathways            | WP2882     | Nuclear Receptors Meta-Pathway                 | -8.33  | -5.42 | 10/322 | BLVRB, NQO1, FTH1, G6PD, GCLC, GCLM, HMOX1, MGST1, SLC2A1, TXN     |
| 2 | GO Biological Processes | GO:0006979 | response to oxidative stress                   | -6.99  | -4.13 | 10/447 | DHCR24, NQO1, G6PD, GCLC, GCLM, HMOX1, MGST1, TXN, FOSL1, TMEM161A |
| 2 | GO Biological Processes | GO:0062197 | cellular response to chemical stress           | -5.75  | -3.07 | 8/349  | NQO1, G6PD, HMOX1, MGST1, SLC2A1, TXN, ERRFI1, TMEM161A            |
| 2 | GO Biological Processes | GO:0009991 | response to extracellular stimulus             | -4.76  | -2.25 | 8/477  | NQO1, G6PD, GCLM, HMGCS1, HMOX1, SLC2A1, FOSL1, GDF15              |
| 2 | GO Biological Processes | GO:0042493 | response to drug                               | -4.63  | -2.19 | 7/359  | AK4, NQO1, GCLM, HMGCS1, HMOX1, MGST1, FOSL1                       |
| 2 | GO Biological Processes | GO:0034599 | cellular response to oxidative                 | -4.09  | -1.77 | 6/301  | NQO1, G6PD, HMOX1, MGST1, TXN,                                     |



|   |                         |            |                                                              |       |       |       |                                                   |
|---|-------------------------|------------|--------------------------------------------------------------|-------|-------|-------|---------------------------------------------------|
|   |                         |            | stress                                                       |       |       |       | TMEM161A                                          |
| 2 | GO Biological Processes | GO:1901214 | regulation of neuron death                                   | -4.08 | -1.77 | 6/302 | CTSZ, DHCR24, NQO1, G6PD, GCLM, HMOX1             |
| 2 | GO Biological Processes | GO:0031667 | response to nutrient levels                                  | -4.01 | -1.72 | 7/451 | NQO1, G6PD, GCLM, HMGCS1, HMOX1,<br>SLC2A1, GDF15 |
| 2 | GO Biological Processes | GO:0070997 | neuron death                                                 | -3.78 | -1.57 | 6/342 | CTSZ, DHCR24, NQO1, G6PD, GCLM, HMOX1             |
| 2 | GO Biological Processes | GO:0010035 | response to inorganic substance                              | -3.52 | -1.37 | 7/542 | CA2, NQO1, G6PD, HMGCS1, HMOX1, TXN,<br>FOSL1     |
| 2 | GO Biological Processes | GO:0042542 | response to hydrogen peroxide                                | -3.51 | -1.36 | 4/135 | NQO1, HMOX1, TXN, FOSL1                           |
| 2 | GO Biological Processes | GO:0007584 | response to nutrient                                         | -3.18 | -1.10 | 4/165 | NQO1, GCLM, HMGCS1, HMOX1                         |
| 2 | GO Biological Processes | GO:0043523 | regulation of neuron apoptotic<br>process                    | -2.90 | -0.84 | 4/197 | NQO1, G6PD, GCLM, HMOX1                           |
| 2 | GO Biological Processes | GO:0000302 | response to reactive oxygen<br>species                       | -2.69 | -0.68 | 4/225 | NQO1, HMOX1, TXN, FOSL1                           |
| 2 | GO Biological Processes | GO:0051402 | neuron apoptotic process                                     | -2.65 | -0.65 | 4/230 | NQO1, G6PD, GCLM, HMOX1                           |
| 2 | GO Biological Processes | GO:0097305 | response to alcohol                                          | -2.63 | -0.63 | 4/234 | NQO1, G6PD, HMGCS1, FOSL1                         |
| 2 | GO Biological Processes | GO:0043065 | positive regulation of apoptotic<br>process                  | -2.61 | -0.62 | 6/574 | ALDH1A3, CTSD, NQO1, HMOX1, FOSL1,<br>ARHGEF7     |
| 2 | GO Biological Processes | GO:0043068 | positive regulation of<br>programmed cell death              | -2.55 | -0.57 | 6/590 | ALDH1A3, CTSD, NQO1, HMOX1, FOSL1,<br>ARHGEF7     |
| 2 | GO Biological Processes | GO:0010942 | positive regulation of cell death                            | -2.34 | -0.41 | 6/652 | ALDH1A3, CTSD, NQO1, HMOX1, FOSL1,<br>ARHGEF7     |
| 2 | GO Biological Processes | GO:0010038 | response to metal ion                                        | -2.00 | -0.11 | 4/352 | CA2, NQO1, G6PD, HMOX1                            |
| 3 | KEGG Pathway            | hsa00480   | Glutathione metabolism                                       | -8.47 | -5.51 | 6/54  | G6PD, GCLC, GCLM, MGST1, RRM2, RRM2B              |
| 3 | KEGG Pathway            | ko00480    | Glutathione metabolism                                       | -8.47 | -5.51 | 6/54  | G6PD, GCLC, GCLM, MGST1, RRM2, RRM2B              |
| 3 | WikiPathways            | WP3        | Phytochemical activity on NRF2<br>transcriptional activation | -7.41 | -4.51 | 4/15  | NQO1, GCLC, GCLM, HMOX1                           |



|   |                         |               |                                                               |       |       |       |                                       |
|---|-------------------------|---------------|---------------------------------------------------------------|-------|-------|-------|---------------------------------------|
| 3 | WikiPathways            | WP3612        | Photodynamic therapy-induced NFE2L2 (NRF2) survival signaling | -6.60 | -3.78 | 4/23  | NQO1, GCLC, GCLM, HMOX1               |
| 3 | WikiPathways            | WP4357        | NRF2-ARE regulation                                           | -6.60 | -3.78 | 4/23  | NQO1, GCLC, GCLM, HMOX1               |
| 3 | WikiPathways            | WP408         | Oxidative Stress                                              | -5.89 | -3.17 | 4/34  | NQO1, GCLC, HMOX1, MGST1              |
| 3 | WikiPathways            | WP4313        | Ferroptosis                                                   | -5.60 | -2.96 | 4/40  | FTH1, GCLC, GCLM, HMOX1               |
| 3 | KEGG Pathway            | ko04216       | Ferroptosis                                                   | -5.60 | -2.96 | 4/40  | FTH1, GCLC, GCLM, HMOX1               |
| 3 | KEGG Pathway            | hsa04216      | Ferroptosis                                                   | -5.35 | -2.73 | 4/46  | FTH1, GCLC, GCLM, HMOX1               |
| 3 | Reactome Gene Sets      | R-HSA-211859  | Biological oxidations                                         | -4.82 | -2.31 | 6/222 | ALDH2, FDXR, GCLC, GCLM, MGST1, UGDH  |
| 3 | WikiPathways            | WP100         | Glutathione metabolism                                        | -4.66 | -2.20 | 3/23  | G6PD, GCLC, GCLM                      |
| 3 | Reactome Gene Sets      | R-HSA-5579029 | Metabolic disorders of biological oxidation enzymes           | -4.14 | -1.81 | 3/34  | FDXR, GCLC, GCLM                      |
| 3 | Reactome Gene Sets      | R-HSA-156590  | Glutathione conjugation                                       | -4.06 | -1.76 | 3/36  | GCLC, GCLM, MGST1                     |
| 3 | Reactome Gene Sets      | R-HSA-156580  | Phase II - Conjugation of compounds                           | -3.87 | -1.61 | 4/109 | GCLC, GCLM, MGST1, UGDH               |
| 3 | GO Biological Processes | GO:0006790    | sulfur compound metabolic process                             | -3.55 | -1.38 | 6/378 | G6PD, GCLC, GCLM, HMGCS1, MGST1, UGDH |
| 3 | WikiPathways            | WP3940        | One carbon metabolism and related pathways                    | -3.53 | -1.37 | 3/54  | GCLC, GCLM, PCYT2                     |
| 3 | Reactome Gene Sets      | R-HSA-5668914 | Diseases of metabolism                                        | -3.53 | -1.37 | 5/245 | FDXR, GCLC, GCLM, GPC1, CTSA          |
| 3 | GO Biological Processes | GO:0006749    | glutathione metabolic process                                 | -3.32 | -1.20 | 3/64  | G6PD, GCLC, GCLM                      |
| 3 | GO Biological Processes | GO:0009064    | glutamine family amino acid metabolic process                 | -3.10 | -1.03 | 3/76  | GCLC, GCLM, LGSN                      |
| 3 | GO Biological Processes | GO:0044272    | sulfur compound biosynthetic process                          | -2.93 | -0.87 | 4/193 | GCLC, GCLM, MGST1, UGDH               |
| 3 | GO Biological Processes | GO:0006520    | cellular amino acid metabolic process                         | -2.09 | -0.18 | 4/332 | NQO1, GCLC, GCLM, LGSN                |



|   |                         |               |                                                     |       |       |        |                                                                    |
|---|-------------------------|---------------|-----------------------------------------------------|-------|-------|--------|--------------------------------------------------------------------|
| 4 | GO Biological Processes | GO:0006720    | isoprenoid metabolic process                        | -7.30 | -4.41 | 7/143  | ALDH1A3, ALDH3A2, FDFT1, GPC1, HMGCS1, IDI1, RDH11                 |
| 4 | GO Biological Processes | GO:0006721    | terpenoid metabolic process                         | -6.29 | -3.51 | 6/124  | ALDH1A3, ALDH3A2, FDFT1, GPC1, HMGCS1, RDH11                       |
| 4 | Reactome Gene Sets      | R-HSA-5365859 | RA biosynthesis pathway                             | -4.72 | -2.24 | 3/22   | ALDH1A3, DHRS4, RDH11                                              |
| 4 | Reactome Gene Sets      | R-HSA-5362517 | Signaling by Retinoic Acid                          | -3.83 | -1.58 | 3/43   | ALDH1A3, DHRS4, RDH11                                              |
| 4 | GO Biological Processes | GO:0016101    | diterpenoid metabolic process                       | -3.79 | -1.57 | 4/114  | ALDH1A3, ALDH3A2, GPC1, RDH11                                      |
| 4 | GO Biological Processes | GO:0006081    | cellular aldehyde metabolic process                 | -3.34 | -1.21 | 3/63   | ALDH1A3, ALDH3A2, RDH11                                            |
| 4 | GO Biological Processes | GO:0001523    | retinoid metabolic process                          | -2.66 | -0.65 | 3/108  | ALDH1A3, GPC1, RDH11                                               |
| 4 | Reactome Gene Sets      | R-HSA-9006931 | Signaling by Nuclear Receptors                      | -2.25 | -0.32 | 4/299  | ALDH1A3, CTSD, DHRS4, RDH11                                        |
| 5 | KEGG Pathway            | hsa04142      | Lysosome                                            | -6.31 | -3.52 | 6/123  | CTSD, CTSZ, LIPA, CTSA, PSAP, SLC17A5                              |
| 5 | KEGG Pathway            | ko04142       | Lysosome                                            | -6.31 | -3.52 | 6/123  | CTSD, CTSZ, LIPA, CTSA, PSAP, SLC17A5                              |
| 5 | GO Biological Processes | GO:0043299    | leukocyte degranulation                             | -5.30 | -2.69 | 9/537  | ALDOA, CTSD, CTSZ, SERPINB1, FTH1, HMOX1, MGST1, CTSA, PSAP        |
| 5 | GO Biological Processes | GO:0002275    | myeloid cell activation involved in immune response | -5.22 | -2.65 | 9/550  | ALDOA, CTSD, CTSZ, SERPINB1, FTH1, HMOX1, MGST1, CTSA, PSAP        |
| 5 | GO Biological Processes | GO:0002444    | myeloid leukocyte mediated immunity                 | -5.20 | -2.63 | 9/553  | ALDOA, CTSD, CTSZ, SERPINB1, FTH1, HMOX1, MGST1, CTSA, PSAP        |
| 5 | GO Biological Processes | GO:0045055    | regulated exocytosis                                | -4.83 | -2.31 | 10/780 | ACTN4, ALDOA, CTSD, CTSZ, SERPINB1, FTH1, HMOX1, MGST1, CTSA, PSAP |
| 5 | Reactome Gene Sets      | R-HSA-6798695 | Neutrophil degranulation                            | -4.74 | -2.24 | 8/480  | ALDOA, CTSD, CTSZ, SERPINB1, FTH1, MGST1, CTSA, PSAP               |
| 5 | GO Biological Processes | GO:0043312    | neutrophil degranulation                            | -4.70 | -2.23 | 8/486  | ALDOA, CTSD, CTSZ, SERPINB1, FTH1, MGST1, CTSA, PSAP               |
| 5 | GO Biological Processes | GO:0002283    | neutrophil activation involved in                   | -4.68 | -2.22 | 8/489  | ALDOA, CTSD, CTSZ, SERPINB1, FTH1,                                 |



|   |                         |            |                                                     |       |       |       |                                                                |
|---|-------------------------|------------|-----------------------------------------------------|-------|-------|-------|----------------------------------------------------------------|
|   |                         |            | immune response                                     |       |       |       | MGST1, CTSA, PSAP                                              |
| 5 | GO Biological Processes | GO:0002446 | neutrophil mediated immunity                        | -4.61 | -2.18 | 8/500 | ALDOA, CTSD, CTSZ, SERPINB1, FTH1,<br>MGST1, CTSA, PSAP        |
| 5 | GO Biological Processes | GO:0042119 | neutrophil activation                               | -4.61 | -2.18 | 8/501 | ALDOA, CTSD, CTSZ, SERPINB1, FTH1,<br>MGST1, CTSA, PSAP        |
| 5 | GO Biological Processes | GO:0002274 | myeloid leukocyte activation                        | -4.58 | -2.17 | 9/661 | ALDOA, CTSD, CTSZ, SERPINB1, FTH1,<br>HMOX1, MGST1, CTSA, PSAP |
| 5 | GO Biological Processes | GO:0036230 | granulocyte activation                              | -4.58 | -2.17 | 8/506 | ALDOA, CTSD, CTSZ, SERPINB1, FTH1,<br>MGST1, CTSA, PSAP        |
| 5 | GO Biological Processes | GO:0002366 | leukocyte activation involved in<br>immune response | -4.30 | -1.94 | 9/720 | ALDOA, CTSD, CTSZ, SERPINB1, FTH1,<br>HMOX1, MGST1, CTSA, PSAP |
| 5 | GO Biological Processes | GO:0002263 | cell activation involved in<br>immune response      | -4.28 | -1.93 | 9/724 | ALDOA, CTSD, CTSZ, SERPINB1, FTH1,<br>HMOX1, MGST1, CTSA, PSAP |
| 5 | Canonical Pathways      | M3468      | NABA ECM REGULATORS                                 | -2.60 | -0.61 | 4/238 | CTSD, CTSZ, SERPINB1, CTSA                                     |
| 5 | KEGG Pathway            | hsa04210   | Apoptosis                                           | -2.36 | -0.42 | 3/138 | CTSD, CTSZ, LMNA                                               |
| 5 | KEGG Pathway            | ko04210    | Apoptosis                                           | -2.36 | -0.42 | 3/138 | CTSD, CTSZ, LMNA                                               |
| 5 | Canonical Pathways      | M5885      | NABA MATRISOME<br>ASSOCIATED                        | -2.05 | -0.15 | 6/751 | CTSD, CTSZ, SERPINB1, GPC1, CTSA, GDF15                        |
| 6 | KEGG Pathway            | hsa00010   | Glycolysis / Gluconeogenesis                        | -6.25 | -3.50 | 5/67  | ALDH2, ALDH1A3, ALDH3A2, ALDOA, ENO2                           |
| 6 | KEGG Pathway            | ko00010    | Glycolysis / Gluconeogenesis                        | -6.25 | -3.50 | 5/67  | ALDH2, ALDH1A3, ALDH3A2, ALDOA, ENO2                           |
| 6 | KEGG Pathway            | hsa00280   | Valine, leucine and isoleucine<br>degradation       | -5.28 | -2.68 | 4/48  | ACAT2, ALDH2, ALDH3A2, HMGCS1                                  |
| 6 | KEGG Pathway            | ko00280    | Valine, leucine and isoleucine<br>degradation       | -5.28 | -2.68 | 4/48  | ACAT2, ALDH2, ALDH3A2, HMGCS1                                  |
| 6 | KEGG Pathway            | hsa00340   | Histidine metabolism                                | -4.60 | -2.18 | 3/24  | ALDH2, ALDH1A3, ALDH3A2                                        |
| 6 | KEGG Pathway            | ko00340    | Histidine metabolism                                | -4.60 | -2.18 | 3/24  | ALDH2, ALDH1A3, ALDH3A2                                        |



|   |                         |              |                                                      |       |       |        |                                                                    |
|---|-------------------------|--------------|------------------------------------------------------|-------|-------|--------|--------------------------------------------------------------------|
| 6 | KEGG Pathway            | hsa00053     | Ascorbate and aldarate metabolism                    | -4.44 | -2.07 | 3/27   | ALDH2, ALDH3A2, UGDH                                               |
| 6 | KEGG Pathway            | ko00053      | Ascorbate and aldarate metabolism                    | -4.44 | -2.07 | 3/27   | ALDH2, ALDH3A2, UGDH                                               |
| 6 | KEGG Pathway            | hsa00410     | beta-Alanine metabolism                              | -4.26 | -1.92 | 3/31   | ALDH2, ALDH1A3, ALDH3A2                                            |
| 6 | KEGG Pathway            | ko00410      | beta-Alanine metabolism                              | -4.26 | -1.92 | 3/31   | ALDH2, ALDH1A3, ALDH3A2                                            |
| 6 | GO Biological Processes | GO:0034308   | primary alcohol metabolic process                    | -4.12 | -1.80 | 4/94   | ALDH2, ALDH1A3, ALDH3A2, RDH11                                     |
| 6 | KEGG Pathway            | hsa00620     | Pyruvate metabolism                                  | -3.96 | -1.68 | 3/39   | ACAT2, ALDH2, ALDH3A2                                              |
| 6 | KEGG Pathway            | ko00620      | Pyruvate metabolism                                  | -3.96 | -1.68 | 3/39   | ACAT2, ALDH2, ALDH3A2                                              |
| 6 | KEGG Pathway            | hsa00380     | Tryptophan metabolism                                | -3.92 | -1.66 | 3/40   | ACAT2, ALDH2, ALDH3A2                                              |
| 6 | KEGG Pathway            | ko00380      | Tryptophan metabolism                                | -3.92 | -1.66 | 3/40   | ACAT2, ALDH2, ALDH3A2                                              |
| 6 | WikiPathways            | WP465        | Tryptophan metabolism                                | -3.86 | -1.61 | 3/42   | ALDH2, ALDH3A2, DHCR24                                             |
| 6 | KEGG Pathway            | hsa00071     | Fatty acid metabolism                                | -3.80 | -1.57 | 3/44   | ACAT2, ALDH2, ALDH3A2                                              |
| 6 | KEGG Pathway            | ko00071      | Fatty acid degradation                               | -3.80 | -1.57 | 3/44   | ACAT2, ALDH2, ALDH3A2                                              |
| 6 | KEGG Pathway            | hsa00310     | Lysine degradation                                   | -3.42 | -1.28 | 3/59   | ACAT2, ALDH2, ALDH3A2                                              |
| 6 | KEGG Pathway            | ko00310      | Lysine degradation                                   | -3.42 | -1.28 | 3/59   | ACAT2, ALDH2, ALDH3A2                                              |
| 6 | GO Biological Processes | GO:0044282   | small molecule catabolic process                     | -3.23 | -1.13 | 6/434  | ACAT2, ALDH2, ALDH3A2, ALDOA, SCARB1, ENO2                         |
| 6 | GO Biological Processes | GO:0032787   | monocarboxylic acid metabolic process                | -2.37 | -0.42 | 6/645  | ACAT2, ALDH1A3, ALDH3A2, ALDOA, ENO2, MSMO1                        |
| 7 | Reactome Gene Sets      | R-HSA-499943 | Interconversion of nucleotide di- and triphosphates  | -6.12 | -3.38 | 4/30   | AK4, RRM2, TXN, RRM2B                                              |
| 7 | GO Biological Processes | GO:0090407   | organophosphate biosynthetic process                 | -5.91 | -3.18 | 10/587 | AK4, ALDOA, G6PD, HMGCS1, IDI1, PCYT2, RRM2, NAMPT, RRM2B, SELENOI |
| 7 | GO Biological Processes | GO:0015949   | nucleobase-containing small molecule interconversion | -4.44 | -2.07 | 3/27   | AK4, RRM2, RRM2B                                                   |



|   |                         |             |                                                        |       |       |       |                                                    |
|---|-------------------------|-------------|--------------------------------------------------------|-------|-------|-------|----------------------------------------------------|
| 7 | Reactome Gene Sets      | R-HSA-15869 | Metabolism of nucleotides                              | -4.01 | -1.72 | 4/100 | AK4, RRM2, TXN, RRM2B                              |
| 7 | GO Biological Processes | GO:0055086  | nucleobase-containing small molecule metabolic process | -3.95 | -1.67 | 8/623 | AK4, ALDOA, ENO2, HMGCS1, RRM2, UGDH, NAMPT, RRM2B |
| 7 | KEGG Pathway            | hsanan01    | drug metabolism                                        | -3.75 | -1.54 | 4/117 | ALDH1A3, MGST1, RRM2, RRM2B                        |
| 7 | GO Biological Processes | GO:1901137  | carbohydrate derivative biosynthetic process           | -3.67 | -1.48 | 8/684 | AK4, ALDOA, G6PD, GPC1, RRM2, UGDH, RRM2B, STT3B   |
| 7 | GO Biological Processes | GO:0009117  | nucleotide metabolic process                           | -3.54 | -1.37 | 7/538 | AK4, ALDOA, ENO2, HMGCS1, RRM2, NAMPT, RRM2B       |
| 7 | GO Biological Processes | GO:0006753  | nucleoside phosphate metabolic process                 | -3.50 | -1.35 | 7/547 | AK4, ALDOA, ENO2, HMGCS1, RRM2, NAMPT, RRM2B       |
| 7 | GO Biological Processes | GO:0009165  | nucleotide biosynthetic process                        | -3.38 | -1.25 | 5/264 | AK4, ALDOA, RRM2, NAMPT, RRM2B                     |
| 7 | GO Biological Processes | GO:1901293  | nucleoside phosphate biosynthetic process              | -3.36 | -1.23 | 5/267 | AK4, ALDOA, RRM2, NAMPT, RRM2B                     |
| 7 | KEGG Pathway            | hsa00230    | Purine metabolism                                      | -2.08 | -0.18 | 3/174 | AK4, RRM2, RRM2B                                   |
| 7 | KEGG Pathway            | ko00230     | Purine metabolism                                      | -2.08 | -0.18 | 3/174 | AK4, RRM2, RRM2B                                   |
| 8 | WikiPathways            | WP1946      | Cori Cycle                                             | -5.07 | -2.51 | 3/17  | ALDOA, G6PD, SLC2A1                                |
| 8 | GO Biological Processes | GO:0006734  | NADH metabolic process                                 | -3.80 | -1.57 | 3/44  | ALDOA, NQO1, ENO2                                  |
| 8 | KEGG Pathway            | hsa01200    | Carbon metabolism                                      | -3.79 | -1.57 | 4/114 | ACAT2, ALDOA, ENO2, G6PD                           |
| 8 | KEGG Pathway            | ko01200     | Carbon metabolism                                      | -3.79 | -1.57 | 4/114 | ACAT2, ALDOA, ENO2, G6PD                           |
| 8 | WikiPathways            | WP534       | Glycolysis and Gluconeogenesis                         | -3.77 | -1.56 | 3/45  | ALDOA, ENO2, SLC2A1                                |
| 8 | KEGG Pathway            | hsa04066    | HIF-1 signaling pathway                                | -3.72 | -1.52 | 4/119 | ALDOA, ENO2, HMOX1, SLC2A1                         |
| 8 | GO Biological Processes | GO:0006091  | generation of precursor metabolites and energy         | -3.61 | -1.43 | 7/524 | AK4, ALDH2, ALDOA, ENO2, FDXR, G6PD, SDHAF2        |
| 8 | GO Biological Processes | GO:0019674  | NAD metabolic process                                  | -3.61 | -1.43 | 3/51  | ALDOA, NQO1, ENO2                                  |
| 8 | GO Biological Processes | GO:0005996  | monosaccharide metabolic process                       | -3.32 | -1.20 | 5/272 | ALDOA, ENO2, G6PD, PGM5, SLC2A1                    |



|   |                         |             |                                                     |       |       |       |                                                 |
|---|-------------------------|-------------|-----------------------------------------------------|-------|-------|-------|-------------------------------------------------|
| 8 | Canonical Pathways      | M255        | PID HIF1 TFPATHWAY                                  | -3.28 | -1.17 | 3/66  | ALDOA, HMOX1, SLC2A1                            |
| 8 | GO Biological Processes | GO:0005975  | carbohydrate metabolic process                      | -3.17 | -1.10 | 7/620 | ALDH2, ALDOA, ENO2, G6PD, PGM5,<br>SLC2A1, UGDH |
| 8 | Reactome Gene Sets      | R-HSA-71387 | Metabolism of carbohydrates                         | -3.16 | -1.08 | 5/295 | ALDOA, ENO2, G6PD, GPC1, SLC2A1                 |
| 8 | WikiPathways            | WP4018      | Pathways in clear cell renal cell carcinoma         | -2.93 | -0.87 | 3/87  | ALDOA, ENO2, SLC2A1                             |
| 8 | GO Biological Processes | GO:0006006  | glucose metabolic process                           | -2.80 | -0.76 | 4/210 | ALDOA, ENO2, G6PD, PGM5                         |
| 8 | GO Biological Processes | GO:0016051  | carbohydrate biosynthetic process                   | -2.80 | -0.76 | 4/210 | ALDOA, ENO2, G6PD, SLC2A1                       |
| 8 | GO Biological Processes | GO:0046364  | monosaccharide biosynthetic process                 | -2.79 | -0.76 | 3/97  | ALDOA, ENO2, G6PD                               |
| 8 | GO Biological Processes | GO:0019318  | hexose metabolic process                            | -2.52 | -0.54 | 4/250 | ALDOA, ENO2, G6PD, PGM5                         |
| 8 | GO Biological Processes | GO:0046031  | ADP metabolic process                               | -2.51 | -0.53 | 3/122 | AK4, ALDOA, ENO2                                |
| 8 | GO Biological Processes | GO:0019693  | ribose phosphate metabolic process                  | -2.42 | -0.45 | 5/436 | AK4, ALDOA, ENO2, G6PD, HMGCS1                  |
| 8 | GO Biological Processes | GO:0006165  | nucleoside diphosphate phosphorylation              | -2.41 | -0.45 | 3/132 | AK4, ALDOA, ENO2                                |
| 8 | GO Biological Processes | GO:0046939  | nucleotide phosphorylation                          | -2.40 | -0.45 | 3/133 | AK4, ALDOA, ENO2                                |
| 8 | GO Biological Processes | GO:0009135  | purine nucleoside diphosphate metabolic process     | -2.38 | -0.44 | 3/135 | AK4, ALDOA, ENO2                                |
| 8 | GO Biological Processes | GO:0009179  | purine ribonucleoside diphosphate metabolic process | -2.38 | -0.44 | 3/135 | AK4, ALDOA, ENO2                                |
| 8 | GO Biological Processes | GO:0009185  | ribonucleoside diphosphate metabolic process        | -2.36 | -0.42 | 3/138 | AK4, ALDOA, ENO2                                |
| 8 | GO Biological Processes | GO:0009132  | nucleoside diphosphate metabolic process            | -2.21 | -0.29 | 3/156 | AK4, ALDOA, ENO2                                |
| 8 | GO Biological Processes | GO:0046034  | ATP metabolic process                               | -2.18 | -0.26 | 4/313 | AK4, ALDOA, ENO2, SDHAF2                        |



|    |                         |               |                                         |       |       |       |                                                          |
|----|-------------------------|---------------|-----------------------------------------|-------|-------|-------|----------------------------------------------------------|
| 9  | GO Biological Processes | GO:0042445    | hormone metabolic process               | -4.87 | -2.33 | 6/218 | ALDH1A3, SCARB1, CTSZ, DHCR7, FDXR, RDH11                |
| 9  | GO Biological Processes | GO:0010817    | regulation of hormone levels            | -4.53 | -2.15 | 8/513 | ALDH1A3, SCARB1, CTSZ, DHCR7, FDXR, SLC2A1, PHPT1, RDH11 |
| 9  | GO Biological Processes | GO:0120178    | steroid hormone biosynthetic process    | -3.66 | -1.48 | 3/49  | SCARB1, DHCR7, FDXR                                      |
| 9  | GO Biological Processes | GO:0034754    | cellular hormone metabolic process      | -3.50 | -1.35 | 4/136 | ALDH1A3, SCARB1, FDXR, RDH11                             |
| 9  | GO Biological Processes | GO:0042446    | hormone biosynthetic process            | -3.22 | -1.13 | 3/69  | SCARB1, DHCR7, FDXR                                      |
| 10 | Canonical Pathways      | M145          | PID P53 DOWNSTREAM PATHWAY              | -4.72 | -2.24 | 5/137 | CTSD, FDXR, SFN, GDF15, RRM2B                            |
| 10 | Reactome Gene Sets      | R-HSA-5628897 | TP53 Regulates Metabolic Genes          | -4.25 | -1.91 | 4/87  | G6PD, SFN, TXN, RRM2B                                    |
| 10 | WikiPathways            | WP707         | DNA Damage Response                     | -3.22 | -1.13 | 3/69  | SFN, RPA2, RRM2B                                         |
| 10 | KEGG Pathway            | hsa04115      | p53 signaling pathway                   | -3.22 | -1.13 | 3/69  | SFN, RRM2, RRM2B                                         |
| 10 | KEGG Pathway            | ko04115       | p53 signaling pathway                   | -3.22 | -1.13 | 3/69  | SFN, RRM2, RRM2B                                         |
| 10 | WikiPathways            | WP1530        | miRNA Regulation of DNA Damage Response | -2.84 | -0.79 | 3/93  | SFN, RPA2, RRM2B                                         |
| 10 | Reactome Gene Sets      | R-HSA-3700989 | Transcriptional Regulation by TP53      | -2.75 | -0.73 | 5/365 | G6PD, SFN, RPA2, TXN, RRM2B                              |



**Table S5. Down-regulated proteins involved in the mitochondrial respiratory chain complex.** Complex of this table represent mitochondrial respiratory chain complexes.

| Gene names | Protein IDs | Protein names                                                                | P-value | Fold change | Complex |
|------------|-------------|------------------------------------------------------------------------------|---------|-------------|---------|
| MT-ND1     | P03886      | NADH-ubiquinone oxidoreductase chain 1                                       | 0.023   | 0.593       | I       |
| NDUFS1     | P28331      | NADH-ubiquinone oxidoreductase 75 kDa subunit, mitochondrial                 | 0.0009  | 0.854       | I       |
| NDUFS5     | O43920      | NADH dehydrogenase [ubiquinone] iron-sulfur protein 5                        | 0.0117  | 0.714       | I       |
| NDUFS6     | O75380      | NADH dehydrogenase [ubiquinone] iron-sulfur protein 6, mitochondrial         | 0.0012  | 0.567       | I       |
| NDUFS7     | O75251      | NADH dehydrogenase [ubiquinone] iron-sulfur protein 7, mitochondrial         | 0.0004  | 0.618       | I       |
| NDUFV1     | P49821      | NADH dehydrogenase [ubiquinone] flavoprotein 1, mitochondrial                | 0.0001  | 0.713       | I       |
| NDUFV2     | P19404      | NADH dehydrogenase [ubiquinone] flavoprotein 2, mitochondrial                | 0.0038  | 0.805       | I       |
| NDUFA2     | O43678      | NADH dehydrogenase [ubiquinone] 1 alpha subcomplex subunit 2                 | 0       | 0.703       | I       |
| NDUFA5     | Q16718      | NADH dehydrogenase [ubiquinone] 1 alpha subcomplex subunit 5                 | 0.0002  | 0.761       | I       |
| NDUFA10    | O95299      | NADH dehydrogenase [ubiquinone] 1 alpha subcomplex subunit 10, mitochondrial | 0.0251  | 0.644       | I       |
| NDUFA11    | Q86Y39      | NADH dehydrogenase [ubiquinone] 1 alpha subcomplex subunit 11                | 0.0006  | 0.666       | I       |
| NDUFA12    | Q9UI09      | NADH dehydrogenase [ubiquinone] 1 alpha subcomplex subunit 12                | 0.0019  | 0.77        | I       |
| NDUFB3     | O43676      | NADH dehydrogenase [ubiquinone] 1 beta subcomplex subunit 3                  | 0.0037  | 0.644       | I       |
| NDUFB4     | O95168      | NADH dehydrogenase [ubiquinone] 1 beta subcomplex subunit 4                  | 0.0019  | 0.673       | I       |
| NDUFB8     | O95169      | NADH dehydrogenase [ubiquinone] 1 beta subcomplex subunit 8, mitochondrial   | 0.0001  | 0.686       | I       |
| NDUFC1     | O43677      | NADH dehydrogenase [ubiquinone] 1 subunit C1, mitochondrial                  | 0.0029  | 0.727       | I       |
| NDUFC2     | O95298      | NADH dehydrogenase [ubiquinone] 1 subunit C2                                 | 0.0009  | 0.781       | I       |
| SDHA       | P31040      | Succinate dehydrogenase [ubiquinone] flavoprotein subunit, mitochondrial     | 0.0035  | 0.77        | II      |
| SDHB       | P21912      | Succinate dehydrogenase [ubiquinone] iron-sulfur subunit, mitochondrial      | 0.0002  | 0.625       | II      |
| COX7C      | P15954      | Cytochrome c oxidase subunit 7C, mitochondrial                               | 0.0146  | 0.794       | IV      |
| COA4       | Q9NYJ1      | Cytochrome c oxidase assembly factor 4 homolog, mitochondrial                | 0.0105  | 0.801       | IV      |
